# Supplementary material
Source: PubMed Central journal article supplement (PMC6764773)

Map of Wetland and Control Sites on North End of UNCG Campus

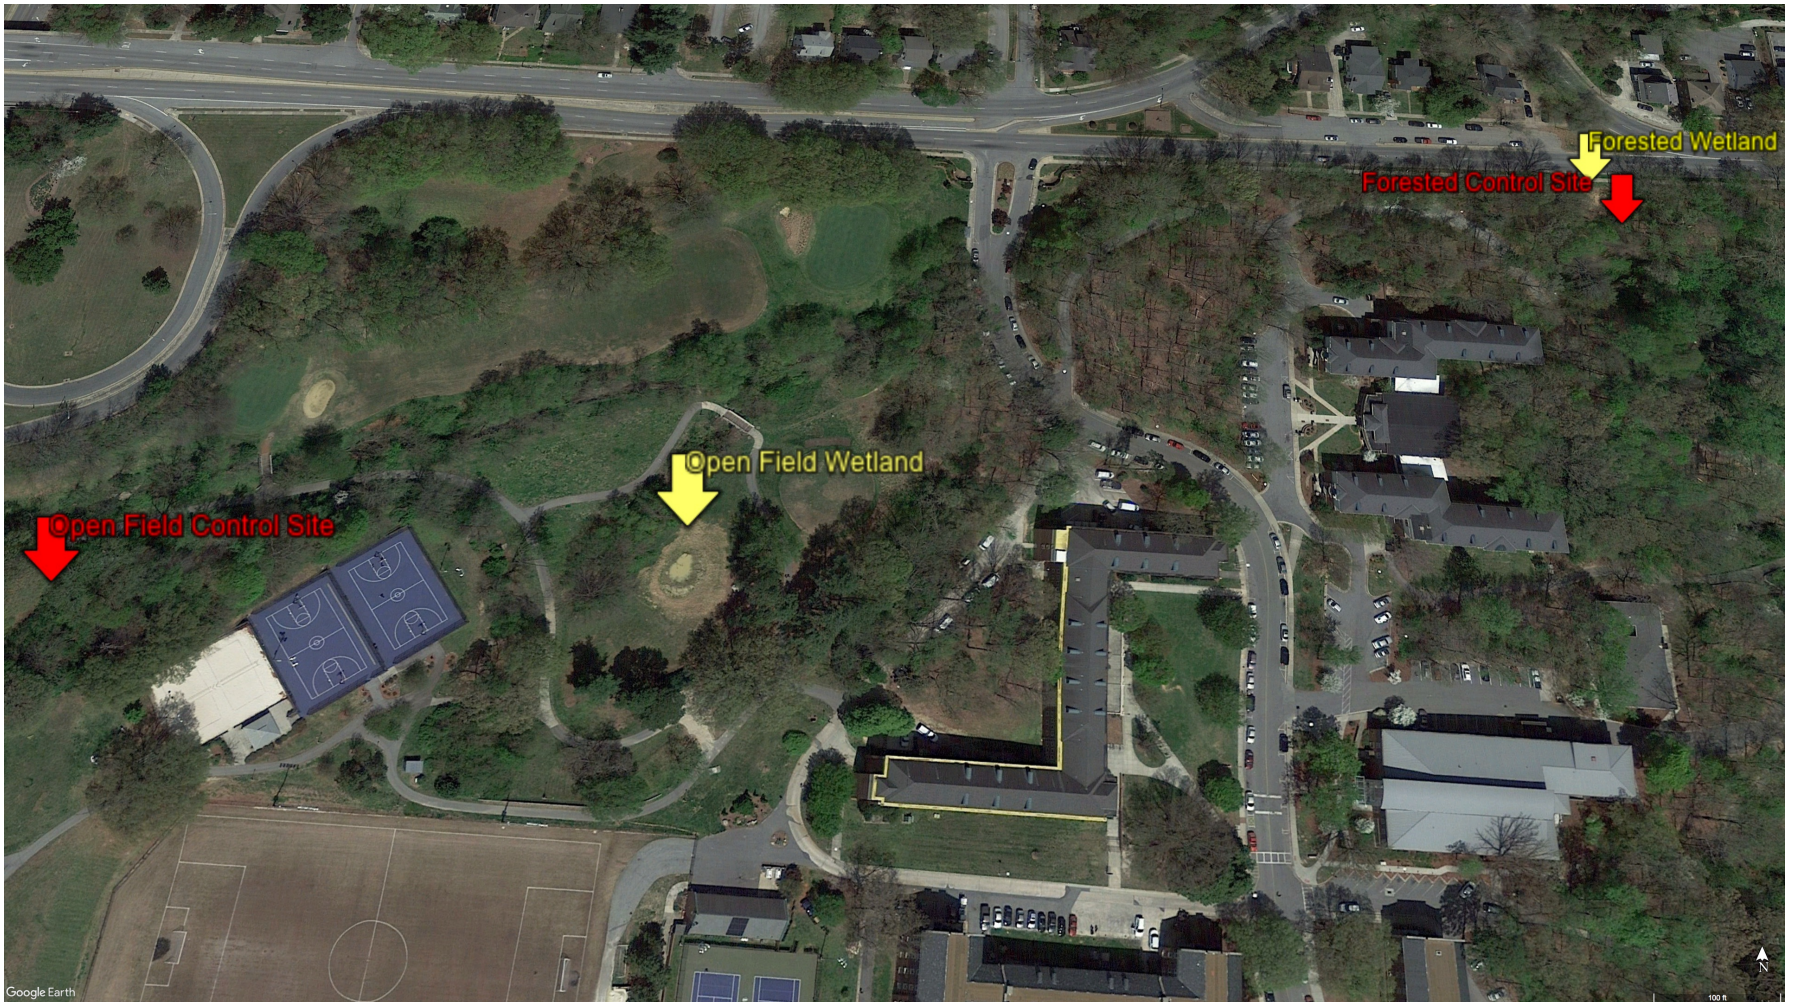



Forested Wetland Before Construction

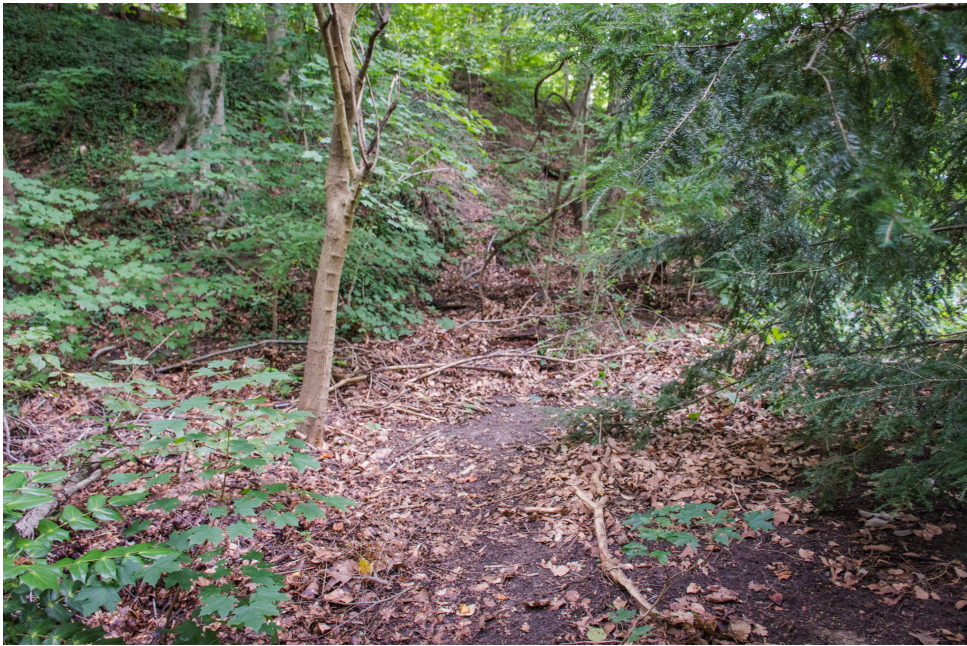

Forested Wetland After Construction

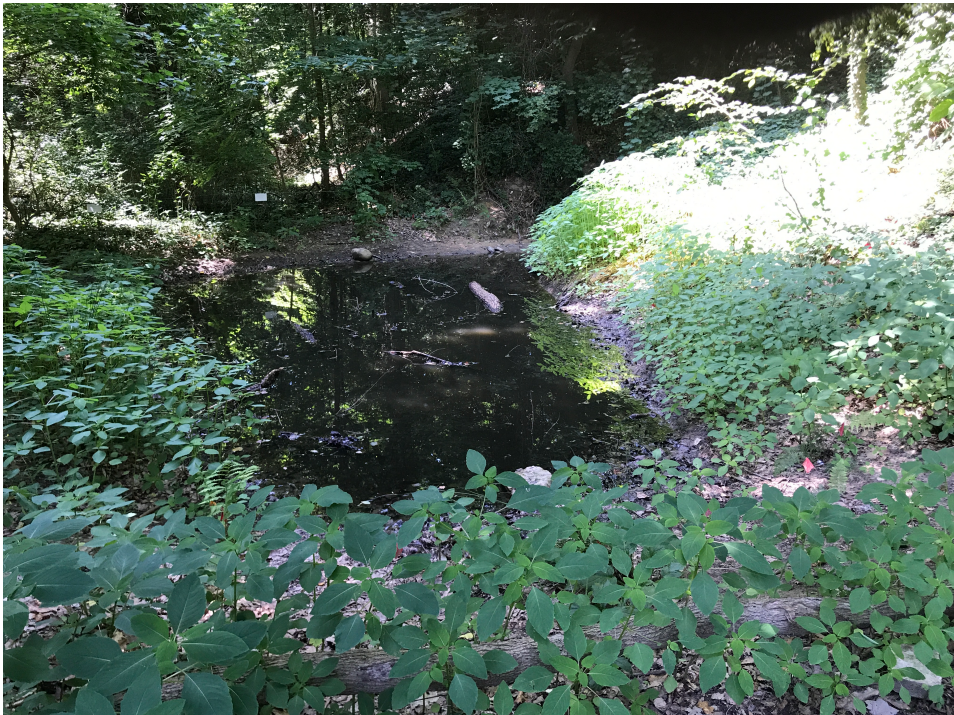



Open Field Wetland Before Construction

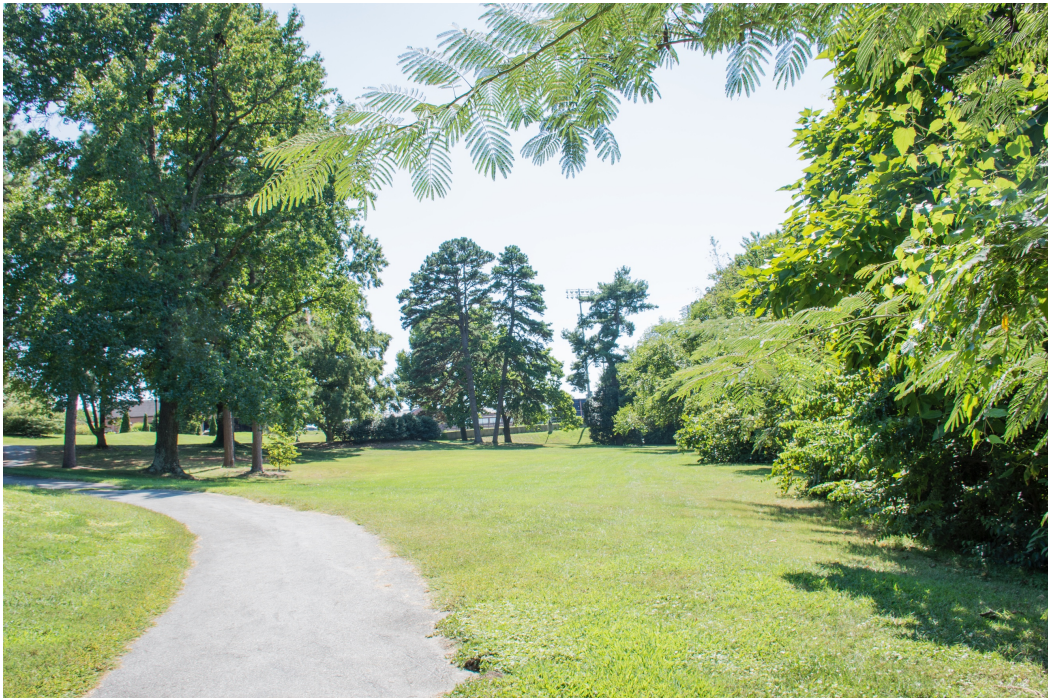

Open Field Wetland After Construction

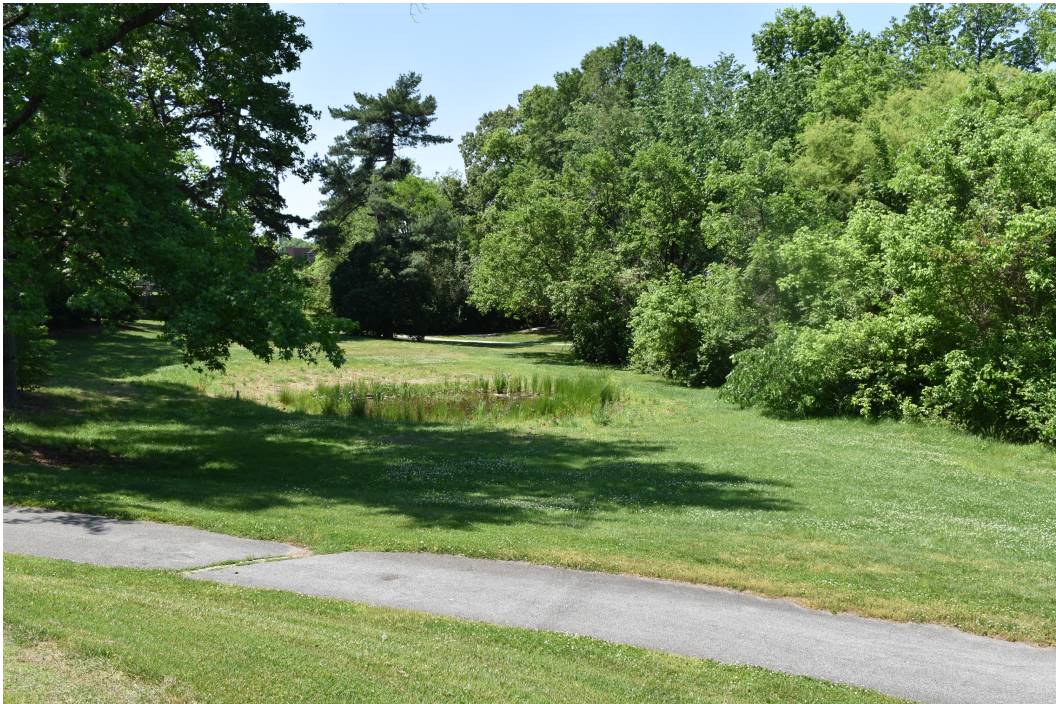



Forested Wetland Control Site

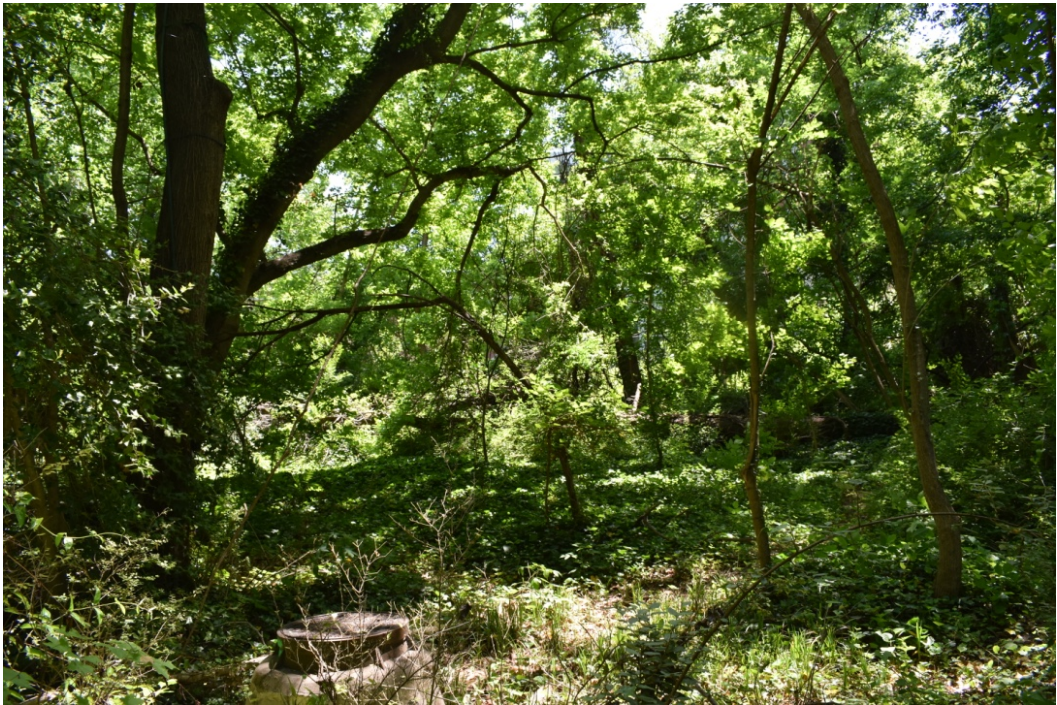

Open Field Wetland Control Site

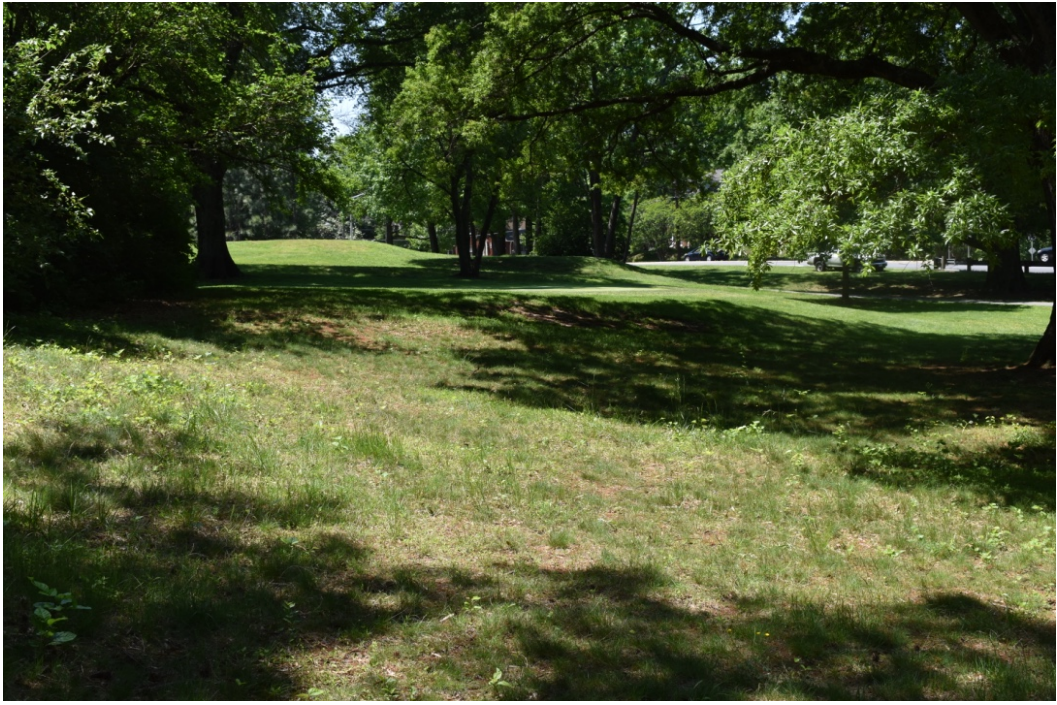

Supplement: NIHMS1514941-supplement-13157_2018_1115_MOESM1_ESM.pdf [file NIHMS1514941-supplement-13157_2018_1115_MOESM1_ESM.pdf]
