# Supplementary material
Source: PubMed Central journal article supplement (PMC6764773)

Supplementary Material B: Design and Timeline. Relevant comparisons in all Figures shown.

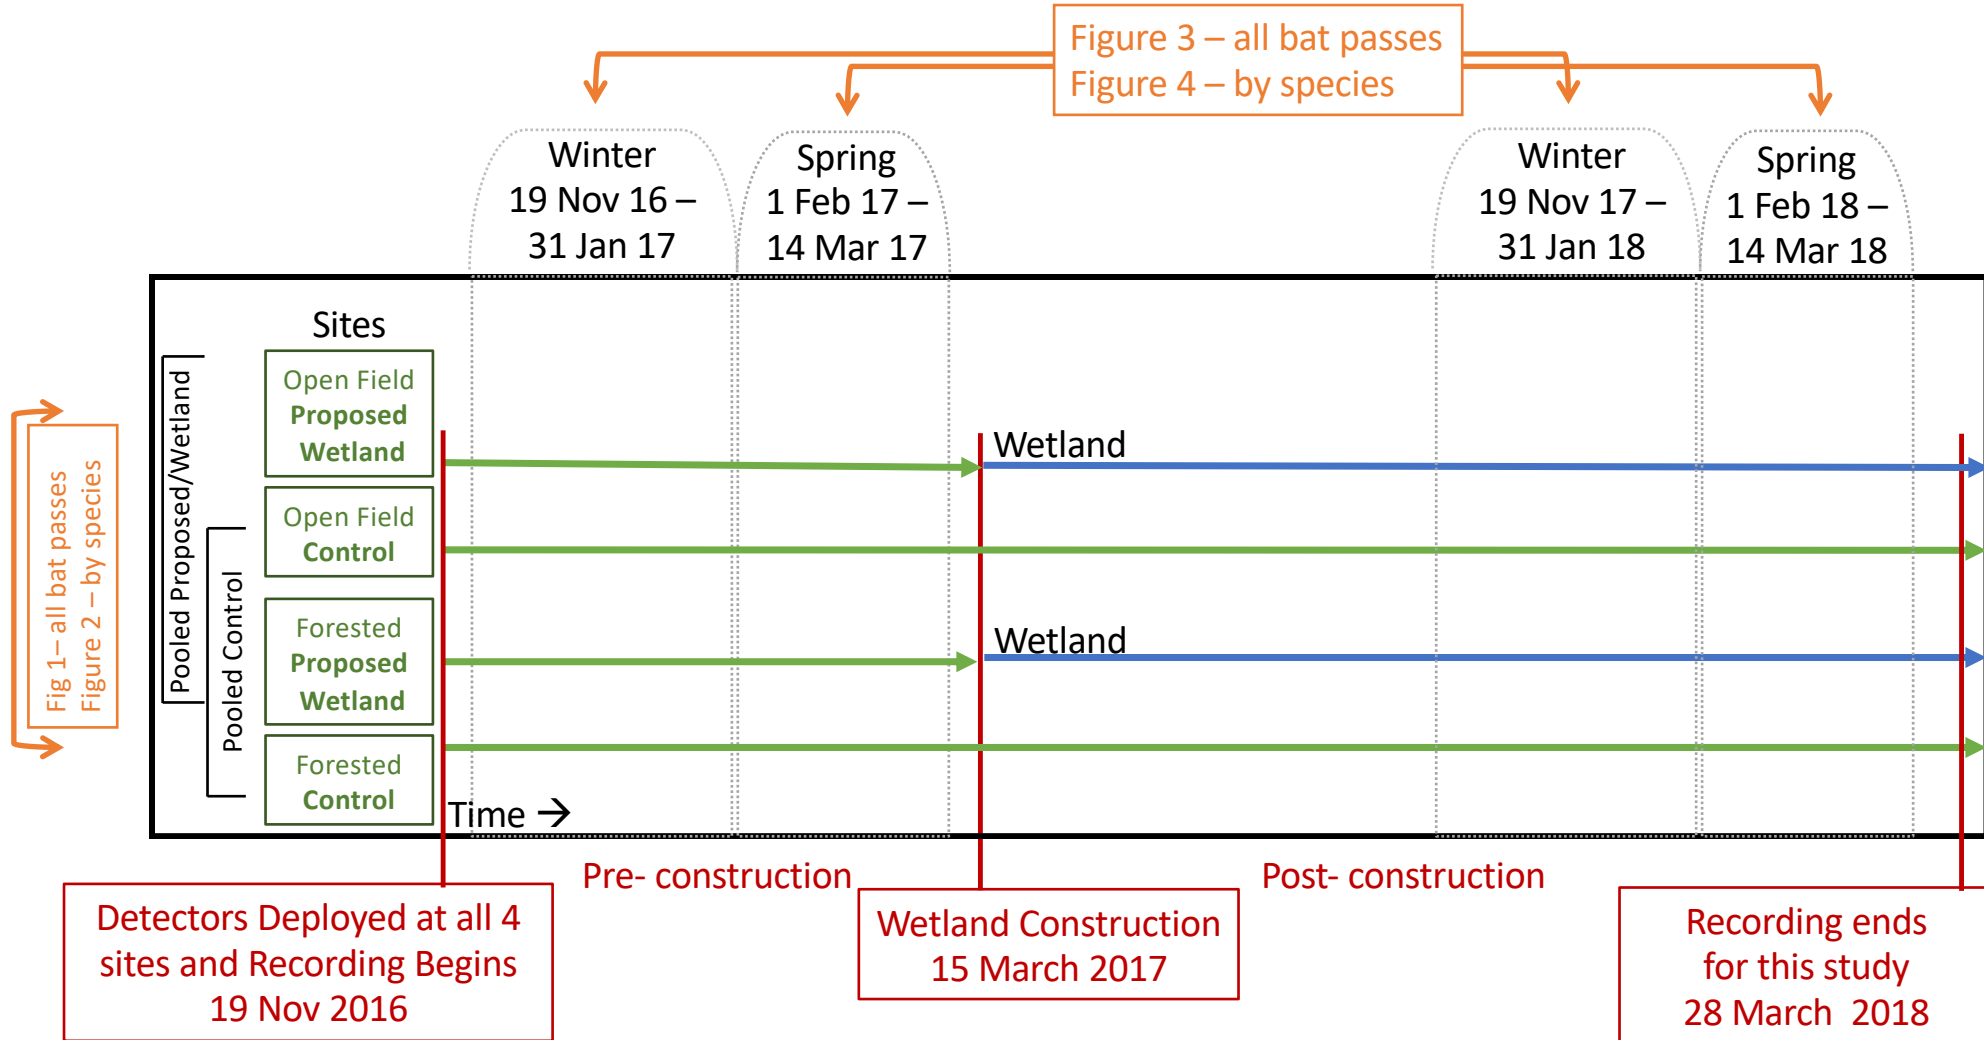

Supplement: NIHMS1514941-supplement-13157_2018_1115_MOESM2_ESM.pdf [file NIHMS1514941-supplement-13157_2018_1115_MOESM2_ESM.pdf]
